# Supplementary material for: Flexible Ti3C2Tx/PEDOT:PSS films with outstanding volumetric capacitance for asymmetric supercapacitors
Source: Royal Society of Chemistry journal article supplement (doi:10.1039/c8dt04374d), 2018-12-26
Supplement: c8dt04374d1.pdf [file c8dt04374d1.pdf]

## Supporting Information

### **Flexible $\text{Ti}_3\text{C}_2\text{T}_x$ /PEDOT:PSS Films with Outstanding Volumetric Capacitance for Asymmetric Supercapacitors**

Lu Li<sup>a, b</sup>, Na Zhang<sup>c</sup>, Mingyi Zhang<sup>b</sup>, Xitian Zhang<sup>\*, b</sup>, Zhiguo Zhang<sup>\*, a</sup>

<sup>a</sup> Condensed Matter Science and Technology Institute, Department of Physics, Harbin Institute of Technology, Harbin 150001, People's Republic of China.

<sup>b</sup> Key Laboratory for Photonic and Electronic Bandgap Materials, Ministry of Education, School of Physics and Electronic Engineering, Harbin Normal University, Harbin 150025, People's Republic of China.

<sup>c</sup> Department of Chemistry and Chemical Biology, Cornell University, Ithaca, USA.

---

\*Corresponding author: E-mail: xtzhazhang@hotmail.com (X. T. Zhang)

\*Corresponding author: E-mail: zhangzhiguo@hit.edu.cn (Z. G. Zhang)

## Calculation

The capacitance could be calculated from CV or GCD curves by the following equations.

For specific capacitance ( $C_m$ ):

$$\text{From CV curves: } C_m = \frac{\int IdV}{2 \cdot m \cdot v \cdot \Delta V} \quad (1)$$

Here,  $C_m$  is the specific capacitance ( $F g^{-1}$ ).  $I$  is the response current (A),  $V$  is the potential vs. reference electrode (V),  $m$  is mass (mg),  $v$  is the scan rate ( $mV s^{-1}$ ),  $\Delta V$  is the potential window (V).

$$\text{From GCD curves: } C_m = \frac{I \cdot \Delta t}{m \cdot \Delta V} \quad (2)$$

Here,  $C_m$  is the specific capacitance ( $F g^{-1}$ ).  $I$  is the current (A),  $\Delta t$  is the discharging time (s),  $m$  is mass (mg) and  $\Delta V$  is the potential window (V).

For volumetric capacitance ( $C_v$ ):

$$C_v = \rho \cdot C_m \quad (3)$$

Here,  $C_m$  is the specific capacitance ( $F g^{-1}$ ),  $C_v$  is the volumetric capacitance ( $F cm^{-3}$ ), and  $\rho$  is the electrode density ( $g cm^{-3}$ ).

Before assembling the ASC, it is necessary to maintain charge balance between positive and negative electrodes. The mass ratio of the negative electrode to the positive electrode was decided based on charge balance theory ( $q_+ = q_-$ ). The charge stored ( $q$ ) by each electrode depends on the following equation:

$$q = C_m \times \Delta V \times m \quad (4)$$

The volumetric capacitance ( $C$ ), energy density ( $E$ ) and power density ( $P$ ) of the

ASC could be calculated by the following equations.

$$C = \frac{I \cdot \Delta t}{v \cdot \Delta V} \quad (5)$$

$$E = \frac{1}{2} C \cdot (\Delta V)^2 \quad (6)$$

$$P = \frac{E}{\Delta t} \quad (7)$$

Here, C is the volumetric capacitance (F cm<sup>-3</sup>), I is the constant discharge current (A), Δt is the discharging time (s), v is the volume of active materials including the two working electrodes (cm<sup>-3</sup>), and ΔV is the cell voltage (V).

**Table S1.** Experimental parameters of the prepared samples.

| <b>Sample</b>                                           | <b>Ti<sub>3</sub>C<sub>2</sub>T<sub>x</sub> NSs<br/>(mL)<br/>(1.5 mg/mL)</b> | <b>PH1000<br/>(<math>\mu</math>L)<br/>(1.5%)</b> | <b>MXene<br/>content</b> | <b>Soaked in<br/>concentrated<br/>H<sub>2</sub>SO<sub>4</sub></b> | <b>Density<br/>(g/cm<sup>3</sup>)</b> |
|---------------------------------------------------------|------------------------------------------------------------------------------|--------------------------------------------------|--------------------------|-------------------------------------------------------------------|---------------------------------------|
| <b>Ti<sub>3</sub>C<sub>2</sub>T<sub>x</sub></b>         | <b>10</b>                                                                    | <b>0</b>                                         | <b>100%</b>              | <b>-</b>                                                          | <b>3.95</b>                           |
| <b>Ti<sub>3</sub>C<sub>2</sub>T<sub>x</sub>/P-50</b>    | <b>10</b>                                                                    | <b>50</b>                                        | <b>95.2%</b>             | <b>-</b>                                                          | <b>3.67</b>                           |
| <b>Ti<sub>3</sub>C<sub>2</sub>T<sub>x</sub>/P-100</b>   | <b>10</b>                                                                    | <b>100</b>                                       | <b>90.9%</b>             | <b>-</b>                                                          | <b>3.29</b>                           |
| <b>Ti<sub>3</sub>C<sub>2</sub>T<sub>x</sub>/P-200</b>   | <b>10</b>                                                                    | <b>200</b>                                       | <b>83.3%</b>             | <b>-</b>                                                          | <b>3.13</b>                           |
| <b>Ti<sub>3</sub>C<sub>2</sub>T<sub>x</sub>-H</b>       | <b>10</b>                                                                    | <b>0</b>                                         | <b>-</b>                 | <b>24 h</b>                                                       | <b>3.95</b>                           |
| <b>Ti<sub>3</sub>C<sub>2</sub>T<sub>x</sub>/P-50-H</b>  | <b>10</b>                                                                    | <b>50</b>                                        | <b>-</b>                 | <b>24 h</b>                                                       | <b>3.92</b>                           |
| <b>Ti<sub>3</sub>C<sub>2</sub>T<sub>x</sub>/P-100-H</b> | <b>10</b>                                                                    | <b>100</b>                                       | <b>-</b>                 | <b>24 h</b>                                                       | <b>3.72</b>                           |
| <b>Ti<sub>3</sub>C<sub>2</sub>T<sub>x</sub>/P-200-H</b> | <b>10</b>                                                                    | <b>200</b>                                       | <b>-</b>                 | <b>24 h</b>                                                       | <b>3.31</b>                           |

**Table S2.** The comparison of related experimental results of volumetric capacitance from recent years.

| <b>Material</b>                        | <b>Electrolyte</b>                    | <b>Volumetric capacitance</b>           | <b>Ref.</b>      |
|----------------------------------------|---------------------------------------|-----------------------------------------|------------------|
| few-layer $Ti_3C_2T_x$                 | 1M KOH                                | 350 mF/cm <sup>3</sup> at 2 mV/s        | 1                |
| $Ti_3C_2T_x$ clay                      | 1M H <sub>2</sub> SO <sub>4</sub>     | 900 mF/cm <sup>3</sup> at 2 mV/s        | 2                |
| d- $Ti_3C_2$ /CNT                      | 6M KOH                                | 393 mF/cm <sup>3</sup> at 5 mV/s        | 3                |
| PPy/ $Ti_3C_2T_x$ films                | 1M H <sub>2</sub> SO <sub>4</sub>     | 1000 mF/cm <sup>3</sup> at 5 mV/s       | 4                |
| $Ti_3C_2T_x$                           | 1M H <sub>2</sub> SO <sub>4</sub>     | 360 mF/cm <sup>3</sup> at 2 mV/s        | 5                |
| Mixed $Ti_3C_2T_x$ /SWCNT              | 1M H <sub>2</sub> SO <sub>4</sub>     | 300 mF/cm <sup>3</sup> at 2 mV/s        | 5                |
| Sandwich-like $Ti_3C_2T_x$ /SWCNT      | 1M H <sub>2</sub> SO <sub>4</sub>     | 390 mF/cm <sup>3</sup> at 2 mV/s        | 5                |
| Sandwich-like $Ti_3C_2T_x$ /OLC        | 1M H <sub>2</sub> SO <sub>4</sub>     | 397 mF/cm <sup>3</sup> at 2 mV/s        | 5                |
| Sandwich-like $Ti_3C_2T_x$ /rGO        | 1M H <sub>2</sub> SO <sub>4</sub>     | 435 mF/cm <sup>3</sup> at 2 mV/s        | 5                |
| d- $Ti_3C_2$                           | 1M H <sub>2</sub> SO <sub>4</sub>     | 520 mF/cm <sup>3</sup> at 2 mV/s        | 6                |
| $Ti_3C_2T_x$ /PVA                      | 1M KOH                                | 528 mF/cm <sup>3</sup> at 2 mV/s        | 7                |
| $Ti_3C_2T_x$ hydrogels                 | 3M H <sub>2</sub> SO <sub>4</sub>     | 1500 mF/cm <sup>3</sup> at 2 mV/s       | 8                |
| $Ti_3C_2T_x$ /PDDA film                | 1M KOH                                | 296 mF/cm <sup>3</sup> at 2 mV/s        | 7                |
| HM treated $Ti_3C_2T_x$                | 1M H <sub>2</sub> SO <sub>4</sub>     | 250 mF/cm <sup>3</sup> at 2 mV/s        | 9                |
| $Ti_3C_2T_x$ /rGO                      | 3M H <sub>2</sub> SO <sub>4</sub>     | 1040 mF/cm <sup>3</sup> at 2 mV/s       | 10               |
| $Ti_3C_2T_x$ /P3                       | 1M H <sub>2</sub> SO <sub>4</sub>     | 1026 mF/cm <sup>3</sup> at 2 mV/s       | 11               |
| MnO <sub>x</sub> - $Ti_3C_2$ film      | 1 M LiSO <sub>4</sub>                 | 602 mF/cm <sup>3</sup> at 2 mV/s        | 12               |
| <b><math>Ti_3C_2T_x</math>/P-100-H</b> | <b>1M H<sub>2</sub>SO<sub>4</sub></b> | <b>1065 mF/cm<sup>3</sup> at 2 mV/s</b> | <b>This work</b> |

**Table S3.** The comparison of related experimental results from recent years.

| Supercapacitor                                                  | Energy density<br>(mWh/cm <sup>3</sup> ) | Power density<br>(mW/cm <sup>3</sup> ) | Reference |
|-----------------------------------------------------------------|------------------------------------------|----------------------------------------|-----------|
| EG/Ti <sub>3</sub> C <sub>2</sub> 1:3 SC                        | 4.8                                      | 40                                     | 13        |
|                                                                 | 1.4                                      | 1 600                                  |           |
| Ti <sub>3</sub> C <sub>2</sub> /rGO-5% SC                       | 10.3                                     | 74 400                                 | 10        |
| MnO <sub>x</sub> / Ti <sub>3</sub> C <sub>2</sub> SC            | 13.6                                     | 100                                    | 12        |
|                                                                 | 10.5                                     | 3 756                                  |           |
| Ti <sub>3</sub> C <sub>2</sub> // rGO ASC                       | 8.6                                      | 200                                    | 14        |
| L-s- Ti <sub>3</sub> C <sub>2</sub> SC                          | 11                                       | 15 000                                 | 15        |
|                                                                 | 18                                       | 700                                    |           |
| Ti <sub>3</sub> C <sub>2</sub> SC                               | 5.48                                     | ~1 000                                 | 16        |
|                                                                 | 6.1                                      | ~100                                   |           |
| Nanoporous Ti <sub>3</sub> C <sub>2</sub> film SC               | 20.7                                     | 184.8                                  | 17        |
| Ti <sub>3</sub> C <sub>2</sub> SC                               | 2.3                                      | 159.6                                  | 18        |
|                                                                 | 1.3                                      | 2 015                                  |           |
| PPy/l-Ti <sub>3</sub> C <sub>2</sub> SC                         | 10                                       | 500                                    | 19        |
| EG SC                                                           | 4.9                                      | 317 000                                | 20        |
| Nanoporous graphene film SC                                     | 2.65                                     | 20 800                                 | 21        |
| GO film//3D-DG@MnO <sub>2</sub>                                 | 28.2                                     | 30 000                                 | 22        |
|                                                                 | 16                                       | 55 000                                 |           |
| MXene-CNT// RuO <sub>2</sub> /CNT yarn                          | 61.6                                     | 358                                    | 23        |
| Ti <sub>3</sub> C <sub>2</sub> T <sub>x</sub> /P-100-H//rGO ASC | 23                                       | 848                                    | This work |
|                                                                 | 13                                       | 7659                                   |           |

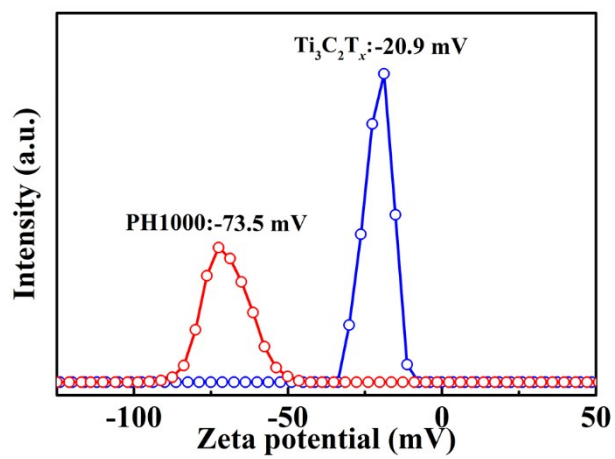

**Fig. S1** Zeta potential of  $Ti_3C_2T_x$  and PH1000 aqueous solution.

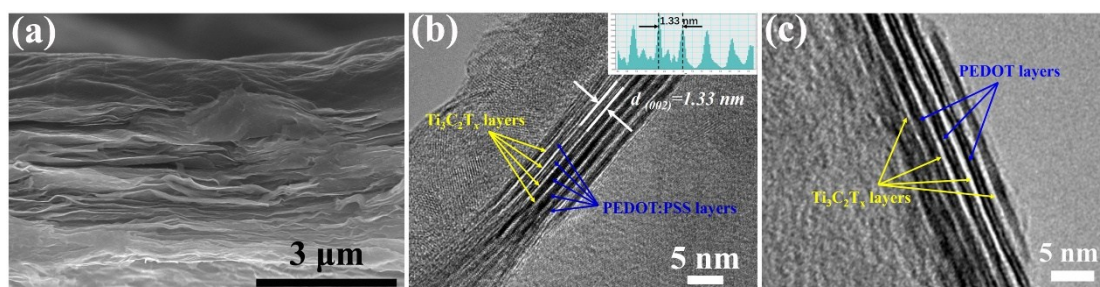

**Fig. S2** (a) Cross-section SEM image of  $\text{Ti}_3\text{C}_2\text{T}_x$  after  $\text{H}_2\text{SO}_4$  treatment. (b) HRTEM images of  $\text{Ti}_3\text{C}_2\text{T}_x/\text{P-100}$  film, inset is profile plot of the calibration for measuring the spacing of  $\text{Ti}_3\text{C}_2\text{T}_x$  NSs. (c) Enlarged HRTEM images of  $\text{Ti}_3\text{C}_2\text{T}_x/\text{P-100-H}$  film.



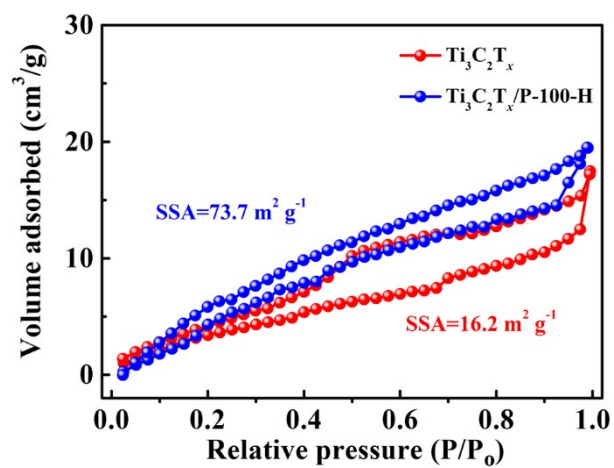

**Fig. S3** Nitrogen adsorption and desorption isotherms of Ti<sub>3</sub>C<sub>2</sub>T<sub>x</sub>/P-100-H hybrid film and Ti<sub>3</sub>C<sub>2</sub>T<sub>x</sub> film.

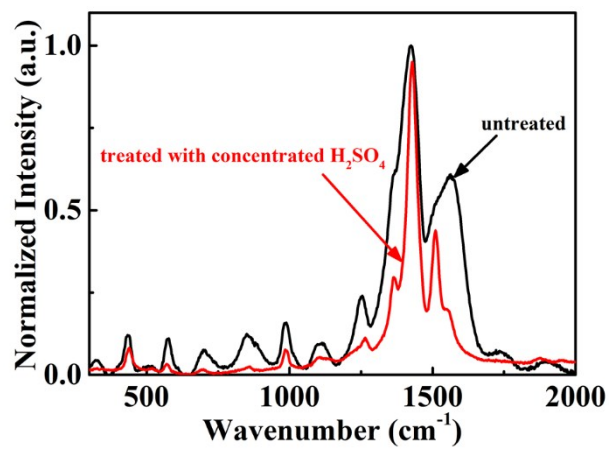

**Fig. S4** Raman spectra of PEDOT film before and after concentrated H<sub>2</sub>SO<sub>4</sub> treatment.

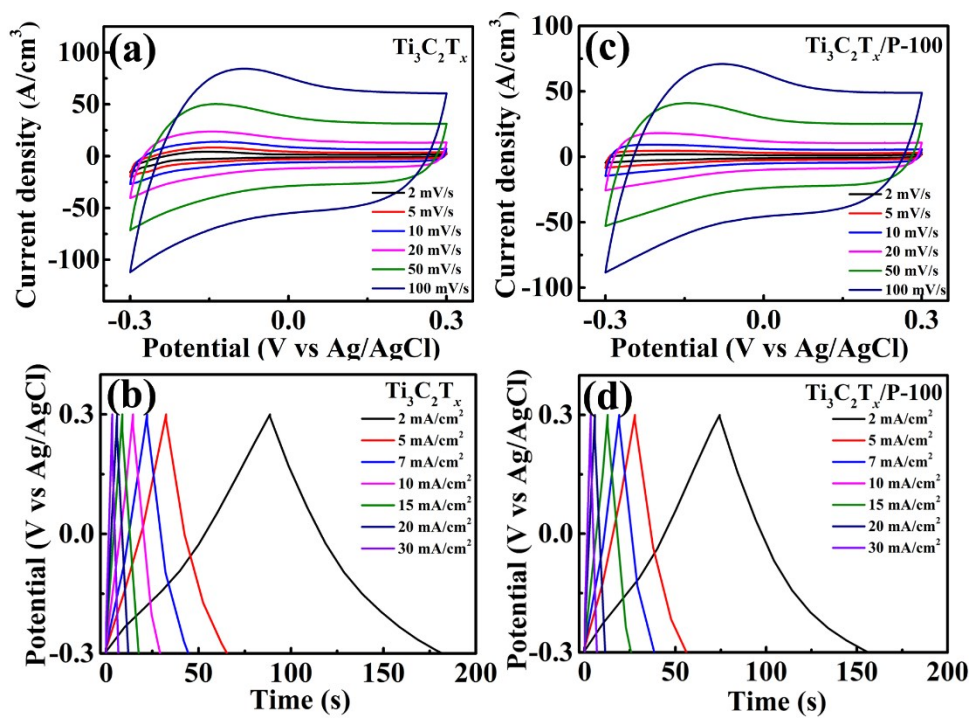

**Fig. S5** CV curves of (a)  $\text{Ti}_3\text{C}_2\text{T}_x$  and (c)  $\text{Ti}_3\text{C}_2\text{T}_x/\text{P-100}$  electrode at different scan rates, GCD curves of (b)  $\text{Ti}_3\text{C}_2\text{T}_x$  and (d)  $\text{Ti}_3\text{C}_2\text{T}_x/\text{P-100}$  electrode at different current densities.

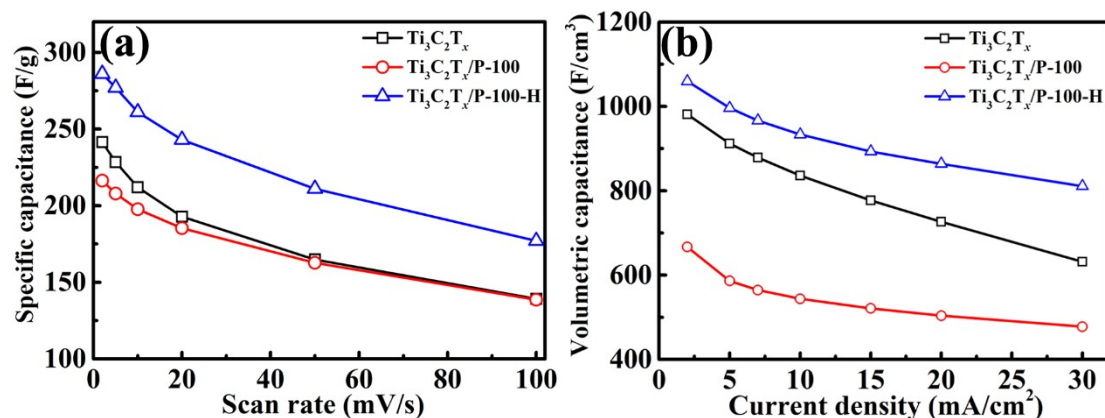

**Fig. S6** (a) Specific capacitance of the as-prepared hybrid film electrodes as a function of scan rate. (b) Volumetric capacitance of the as-prepared hybrid film electrodes as a function of current density.

The relationships of specific capacitance as a function of scan rates for the as-prepared samples are shown Fig. S6(a). The pure  $\text{Ti}_3\text{C}_2\text{T}_x$  film electrode showed the specific capacitance of  $241 \text{ F g}^{-1}$  at  $2 \text{ mV s}^{-1}$  and a rate performance of 58 % as the scan rate increases to  $100 \text{ mV s}^{-1}$ . After mixing PH1000 with  $\text{Ti}_3\text{C}_2\text{T}_x$  to form the  $\text{Ti}_3\text{C}_2\text{T}_x/\text{P-100}$  film, the specific capacitance decreases dramatically to  $216 \text{ F g}^{-1}$  at  $2 \text{ mV s}^{-1}$ . However, after treated by concentrated  $\text{H}_2\text{SO}_4$ , the specific capacitance of  $\text{Ti}_3\text{C}_2\text{T}_x/\text{P-100-H}$  film electrode is significantly improved to  $286 \text{ F g}^{-1}$  at  $2 \text{ mV s}^{-1}$  and the capacitance retention is 62% after increasing the scan rate by 50 times.

The volumetric capacitance calculated from GCD curves of the as-prepared samples are shown Fig. S6(b). Compared with the pure  $\text{Ti}_3\text{C}_2\text{T}_x$  film electrode with volumetric capacitance of  $980 \text{ F cm}^{-3}$  at  $2 \text{ mA cm}^{-2}$ , the  $\text{Ti}_3\text{C}_2\text{T}_x/\text{P-100}$  film showed a decreased volumetric capacitance of  $667 \text{ F cm}^{-3}$ . However, after concentrated  $\text{H}_2\text{SO}_4$  treatment, the volumetric capacitance of  $\text{Ti}_3\text{C}_2\text{T}_x/\text{P-100-H}$  film electrode is significantly improved to  $1060 \text{ F cm}^{-3}$ .

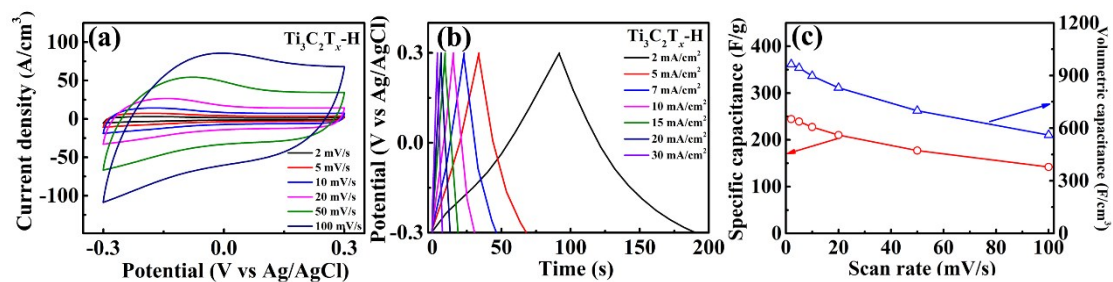

**Fig. S7** (a) CV curves and (b) GCD curves of  $\text{Ti}_3\text{C}_2\text{T}_x\text{-H}$  electrode at different current densities, (c) Volumetric capacitance and specific capacitance of  $\text{Ti}_3\text{C}_2\text{T}_x\text{-H}$  electrode as a function of scan rate.

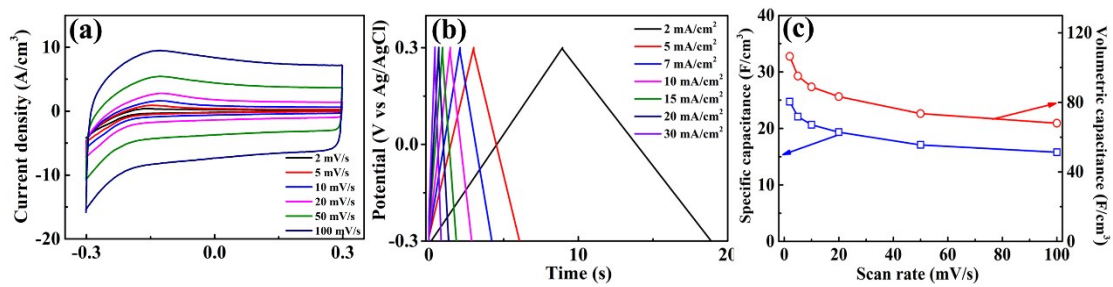

**Fig. S8** (a) CV curves of P-H electrode at different scan rates, (b) GCD curves of P-H electrode at different current densities, (c) Volumetric capacitance and specific capacitance of P-H film electrode as a function of scan rate.

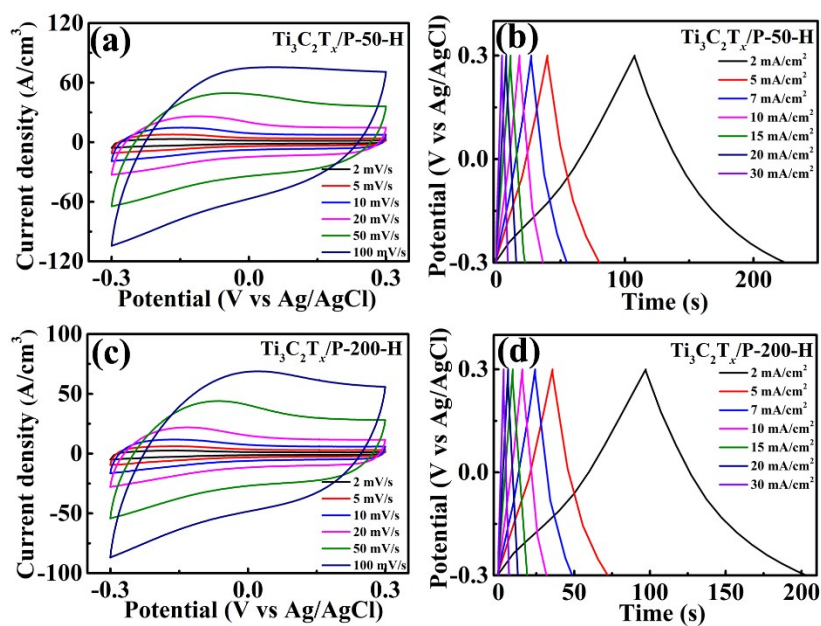

**Fig. S9** CV curves of (a) Ti<sub>3</sub>C<sub>2</sub>T<sub>x</sub>/P-50-H and (c) Ti<sub>3</sub>C<sub>2</sub>T<sub>x</sub>/P-200-H electrode at different scan rates, GCD curves of (b) Ti<sub>3</sub>C<sub>2</sub>T<sub>x</sub>/P-50-H and (d) Ti<sub>3</sub>C<sub>2</sub>T<sub>x</sub>/P-200-H electrode at different current densities.

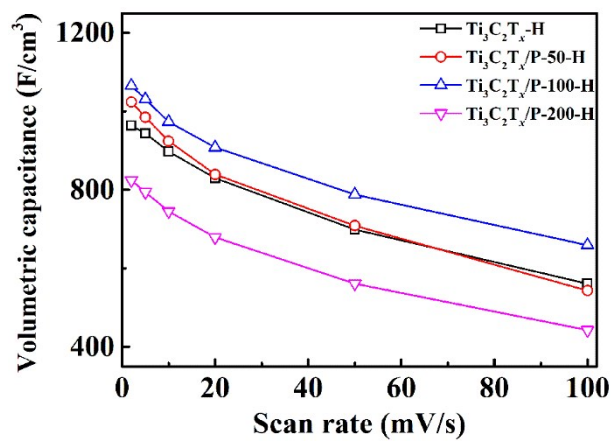

**Fig. S10** Volumetric capacitance of the as-prepared hybrid film electrodes as a function of scan rate.



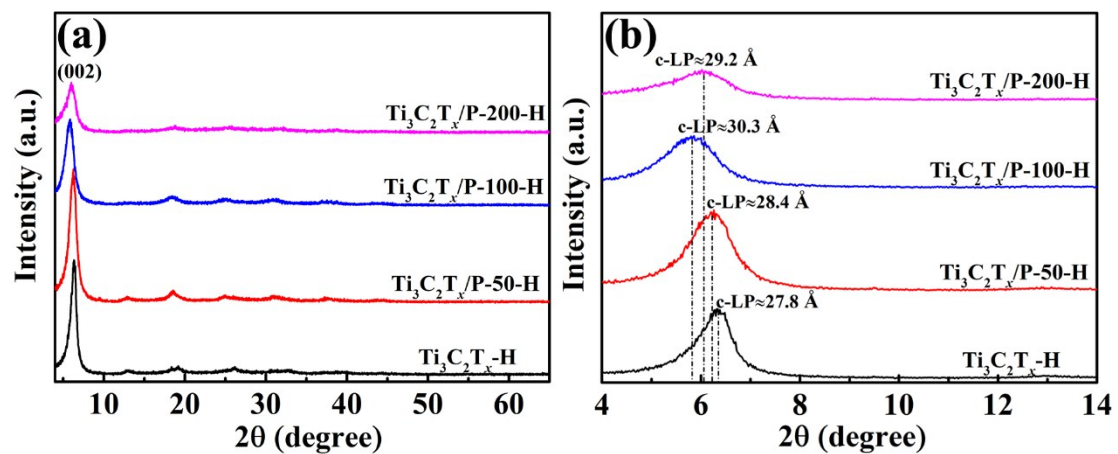

**Fig. S11** (a) XRD patterns of  $\text{Ti}_3\text{C}_2\text{T}_x\text{-H}$ ,  $\text{Ti}_3\text{C}_2\text{T}_x\text{/P-50-H}$ ,  $\text{Ti}_3\text{C}_2\text{T}_x\text{/P-100-H}$  and  $\text{Ti}_3\text{C}_2\text{T}_x\text{/P-200-H}$  and (b) the corresponding enlarged XRD patterns.

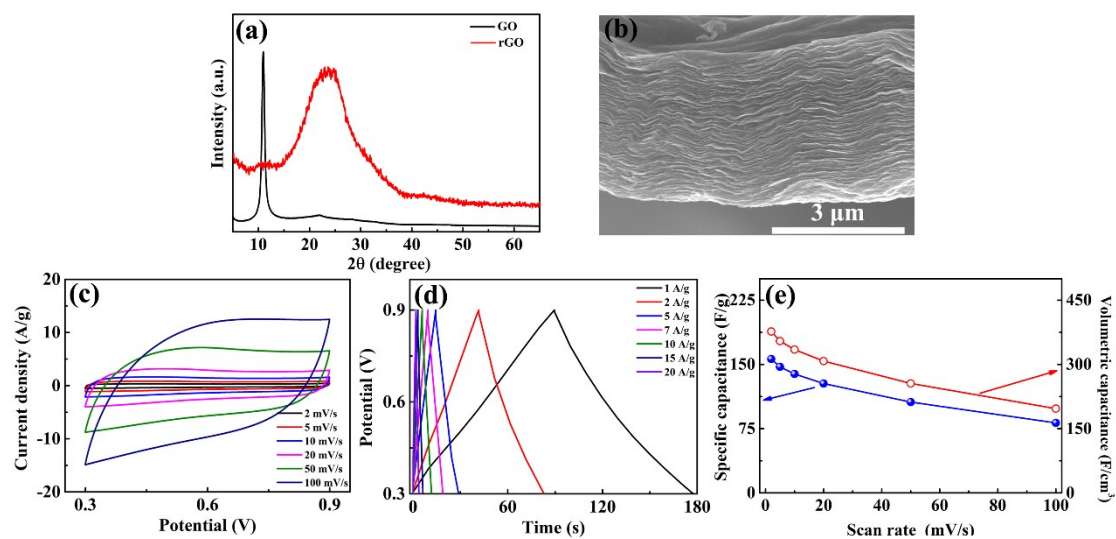

**Fig. S12** (a) XRD patterns of GO and rGO film, (b) cross-section SEM image of rGO film, (c) CV curves of rGO film electrode at different scan rates, (d) GCD curves of rGO film electrode at different current densities, (e) Volumetric capacitance and specific capacitance of rGO film electrode as a function of scan rate.

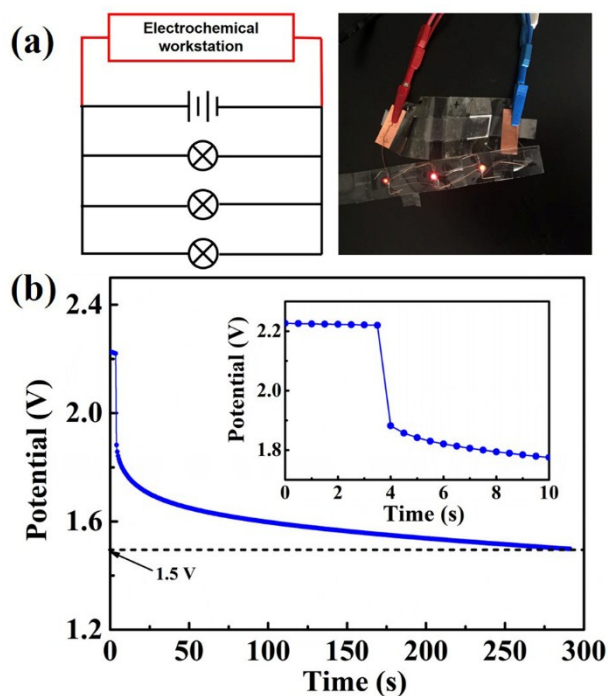

**Fig. S13** (a) The equivalent circuit diagram and physical diagram of OCV test, (b) OCV curve of the serial-connected ASCs, the inset is the enlarged OCV curve.

The discharge curve of the serial-connected ASCs when connected to the LEDs is obtained by OCV test as shown in Fig. S13. Fig. S13 is added in the supplementary. The equivalent circuit diagram and physical diagram of OCV test is shown in Fig. S13a. The electrochemical workstation is in parallel with the ASCs. Once the LEDs are connected to the circuit, the voltage drops significantly at the 4th second, as shown in the inset in Fig. S13b. When the voltage is less than 1.5V, the LEDs are extinguished. Thus, the serial-connected ASCs could drive the luminous band for about five minutes.

## Notes and references

1. M. R. Lukatskaya, O. Mashtalir, C. E. Ren, Y. D. Agnese, P. Rozier, P. L. Taberna, M. Naguib and P. Simon, *Science*, 2013, **341**, 1502.
2. M. Ghidui, M. R. Lukatskaya, M. Q. Zhao, Y. Gogotsi and M. W. Barsoum, *Nature*, 2014, **516**, 78.
3. P. T. Yan, R. J. Zhang, J. Jia, C. Wu, A. G. Zhou, J. Xu and X. S. Zhang, *J. Power Sources.*, 2015, **284**, 38
4. M. Boota, B. Anasori, C. Voigt, M. Q. Zhao, M. W. Barsoum and Y. Gogotsi, *Adv. Mater.*, 2016, **28**, 1517.
5. M. Q. Zhao, C. E. Ren, Z. Ling, M. R. Lukatskaya, C. F. Zhang, K. L. V. Aken, M. W. Barsoum and Y. Gogotsi, *Adv. Mater.*, 2015, **27**, 339.
6. Y. Dall'Agnese, M. R. Lukatskaya, K. M. Cook, P. L. Taberna, Y. Gogotsi and P. Simon, *Electrochem. Commun.*, 2014, **48**, 118.
7. Z. Ling, C. E. Ren, M. Q. Zhao, J. Yang, J. M. Giammarco, J. S. Qiu, M. W. Barsoum and Y. Gogotsi, *PNAS*, 2014, **111**, 16676.
8. M. R. Lukatskaya, S. Kota, Z. F. Lin, M. Q. Zhao, N. Shpigel, M. D. Levi, J. Halim, P. L. Taberna, M. W. Barsoum, P. Simon and Y. Gogotsi, *Nat. Energy.*, 2017, **2**, 17105.
9. O. Mashtalir, M. R. Lukatskaya, A. I. Kolesnikov, E. Raymundo-Piñero, M. Naguib, M. W. Barsouma and Y. Gogotsi, *Nanoscale*, 2016, **8**, 9128.
10. J. Yan, C. E. Ren, K. Maleski, C. B. Hatter, B. Anasori, P. Urbankowski, A. Sarycheva and Y. Gogotsi, *Adv. Funct. Mater.*, 2017, **27**, 1701264.

11. M. Boota, M. Pasini, F. Galeotti, W. Porzio, M. Q. Zhao, J. Halim and Y. Gogotsi, *Chem. Mater.*, 2017, **29**, 2731.
12. Y. P. Tian, C. H. Yang, W. X. Que, X. B. Liu, X. T. Yin and L. B. Kong, *J. Power Sources*, 2017, **359**, 332.
13. H. Y. Li, Y. Hou, F. X. Wang, M. R. Lohe, X. D. Zhuang, L. Niu and X. L. Feng, *Adv. Energy Mater.*, 2016, **28**, 1601847.
14. C. Couly, M. Alhabeab, K. L. Van Aken, N. Kurra, L. Gomes, A. M. Navarro-Suárez, B. Anasori, H. N. Alshareef and Y. Gogotsi, *Adv. Electron. Mater.*, 2018, **4**, 1700339.
15. Y. Y. Peng, B. Akuzum, N. Kurra, M. Q. Zhao, M. Alhabeab, B. Anasori, E. C. Kumbur, H. N. Alshareef, M. D. Ger and Y. Gogotsi, *Energy Environ. Sci.*, 2016, **9**, 2847.
16. H. B. Hu and T. Hua, *J. Mater. Chem. A*, 2017, **5**, 19639.
17. Z. M. Fan, Y. S. Wang, Z. M. Xie, X. Q. Xu, Y. Yuan, Z. J. Cheng and Y. Y. Liu, *Nanoscale*, 2018, **10**, 9642.
18. P. Li, W. H. Shi, W. X. Liu, Y. F. Chen, X. L. Xu, S. F. Ye, R. L. Yin, L. Zhang, L. X. Xu and X. H. Cao, *Nanotechnology*, 2018, **29**, 445401.
19. M. S. Zhu, Y. Huang, Q. H. Deng, J. Zhou, Z. X. Pei, Q. Xue, Y. Huang, Z. F. Wang, H. F. Li, Q. Huang and C. Y. Zhi, *Adv. Energy Mater.*, 2016, **6**, 1600969.
20. Z. S. Wu, Y. J. Zheng, S. H. Zheng, S. Wang, C. L. Sun, K. Parvez, T. Ikeda, X. H. Bao, K. Müllen and X. L. Feng, *Adv. Mater.*, 2017, **29**, 1602960.
21. K. Q. Qin, J. L. Kang, J. J. Li, E. Z. Liu, C. S. Shi, Z. J. Zhang, X. X. Zhang and

- N. Q. Zhao, *Nano energy*, 2016, **24**, 158.
22. K. Q. Qin, E. Z. Liu, J. J. Li, J. L. Kang, C. S. Shi, C. N. He, F. He and N. Q. Zhao, *Adv. Energy Mater.*, 2016, **6**, 1600755.
23. Z. Y. Wang, S. Qin, S. Y. Seyedin, J. Z. Zhang, J. T. Wang, A. Levitt, N. Li, C. Haines, R. O. Robles, W. W. Lei, Y. Gogotsi, R. H. Baughman and J. M. Razal, *Small*, 2018, **14**, 1802225.
